# Supplementary material for: Super strong, shear resistant, and highly elastic lamellar structured ceramic nanofibrous aerogels for thermal insulation
Source: Royal Society of Chemistry journal article supplement (doi:10.1039/d1ta08879c), 2021-01-01
Supplement: d1ta08879c4.pdf [file d1ta08879c4.pdf]

## Electronic Supplementary Information

### **Super strong, shear resistant, and highly elastic lamellar structured ceramic nanofibrous aerogels for thermal insulation**

Xin Zhang,<sup>‡a</sup> Cheng Liu,<sup>‡a</sup> Xinxin Zhang,<sup>a</sup> Yang Si,<sup>\*ab</sup> Jianyong Yu,<sup>ab</sup> and Bin Ding<sup>\*ab</sup>

<sup>a</sup>State Key Laboratory for Modification of Chemical Fibers and Polymer Materials, College of Textiles, Donghua University, Shanghai 201620, China.

<sup>b</sup>Innovation Center for Textile Science and Technology, Donghua University, Shanghai 200051, China.

<sup>‡</sup>X. Zhang and C. Liu contributed equally to this work.

\*E-mail: yangsi@dhu.edu.cn; binding@dhu.edu.cn

## Supplementary Materials

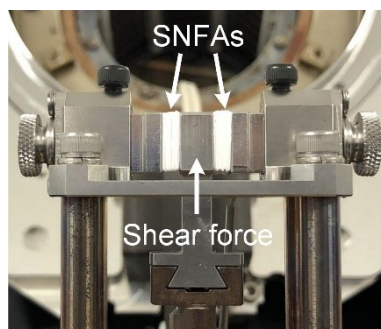

**Fig. S1** The measurement of shear mechanical properties was performed by using a TA-Q850 DMA instrument with a shear sandwich clamp.

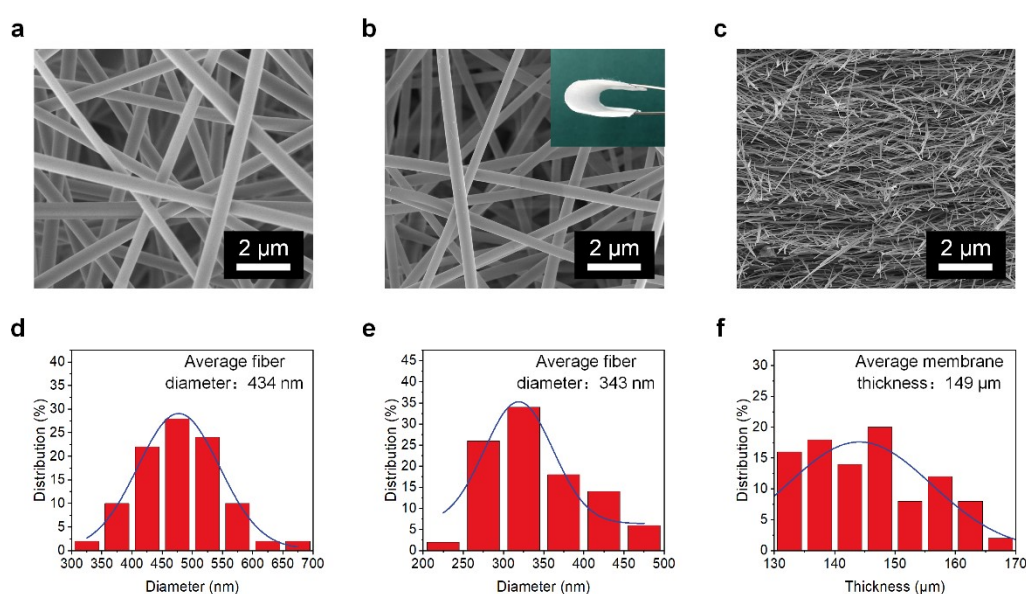

**Fig. S2** Fabrication of electrospun SiO<sub>2</sub> nanofibrous membrane. SEM images of (a) PVA/SiO<sub>2</sub> hybrid nanofibers, (b) SiO<sub>2</sub> nanofibers, and the cross section of (c) SiO<sub>2</sub> nanofibrous membrane. Inset in b: optical image of SiO<sub>2</sub> nanofibrous membrane showing outstanding softness. Diameter distribution histogram of (d) PVA/SiO<sub>2</sub> hybrid nanofibers, and (e) SiO<sub>2</sub> nanofibers. Thickness distribution histogram of (f) SiO<sub>2</sub> nanofibrous membrane.

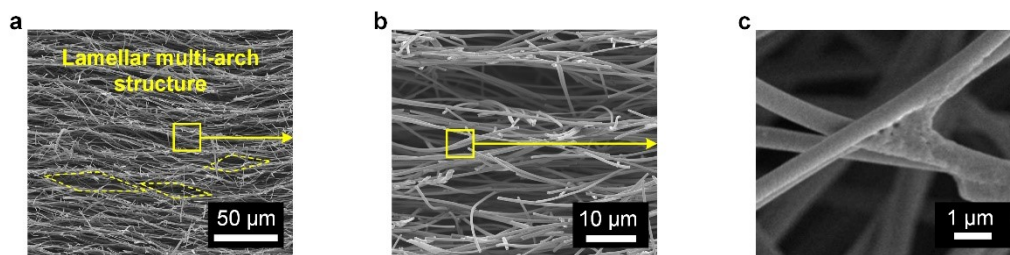

**Fig. S3** (a-c) Microscopic morphologies of SNFAs at different magnifications showing the nanofibrous lamellar multi-arch structure.

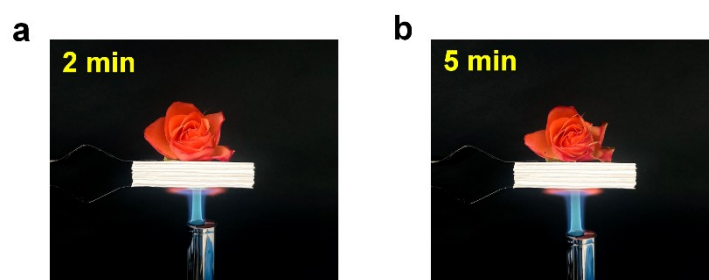

**Fig. S4** Fresh flower was protected by a piece of aerogel with a thickness of 10 mm from withering or carbonization in the flame of butane blowlamp after (a) 2 min and (b) 5 min.

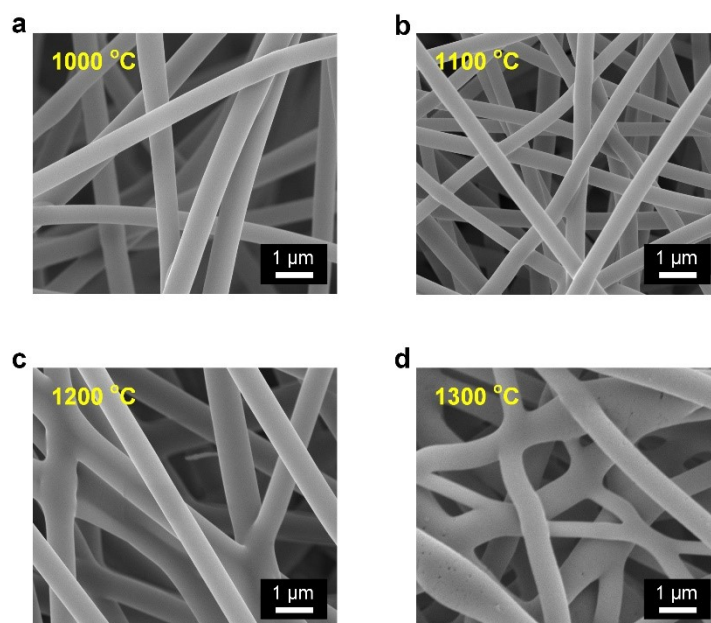

**Fig. S5** (a-d) SEM images of SNFAs after treatment at 1000, 1100, 1200 and 1300 °C for 60 min.

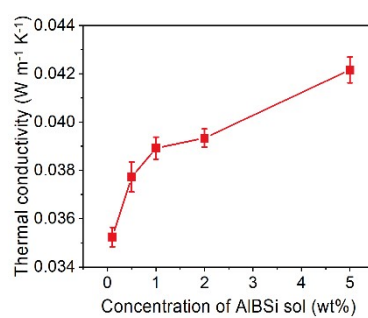

**Fig. S6** Thermal conductivities of the SNFA-0.1, SNFA-0.5, SNFA-1, SNFA-2, and SNFA-5 at room temperature, respectively.
